# Supplementary material
Source: publisher figshare collection journal article supplement (https://acs.figshare.com/ndownloader/files/16706144)
Supplement: Supplementary file 1 [file 16706144]

# Understanding the Lithium Storage Mechanism in Core-Shell Fe<sub>2</sub>O<sub>3</sub>@C Hollow Nanospheres Derived from Metal-Organic Frameworks: An *In operando* Synchrotron Radiation Diffraction and *in operando* X-ray Absorption Spectroscopy Study

Chengping Li,<sup>†</sup> Angelina Sarapulova,<sup>†</sup> Zijian Zhao,<sup>†</sup> Qiang Fu,<sup>†</sup> Vanessa Trouillet,<sup>†,‡</sup> Aleksandr Missiul,<sup>#</sup> Edmund Welter,<sup>†</sup> and Sonia Dsoke \*<sup>†,§</sup>

<sup>†</sup> Institute for Applied Materials (IAM), Karlsruhe Institute of Technology (KIT), Hermann-von-Helmholtz-Platz 1, 76344 Eggenstein-Leopoldshafen, Germany.

<sup>‡</sup> Karlsruhe Nano Micro Facility (KNMF), Karlsruhe Institute of Technology (KIT), Hermann-von-Helmholtz-Platz 1, Eggenstein-Leopoldshafen, 76344, Germany

<sup>§</sup>Helmholtz Institute Ulm for Electrochemical Energy Storage (HIU), Helmholtzstraße 11, 89081 Ulm, Germany

<sup>#</sup> CELLS-ALBA Synchrotron, Cerdanyola del Valles, E-08290 Barcelona, Spain

<sup>†</sup>Deutsches Elektronen-Synchrotron DESY -A Research Centre of the Helmholtz Association, Notkestraße 85, D-22607 Hamburg, Germany

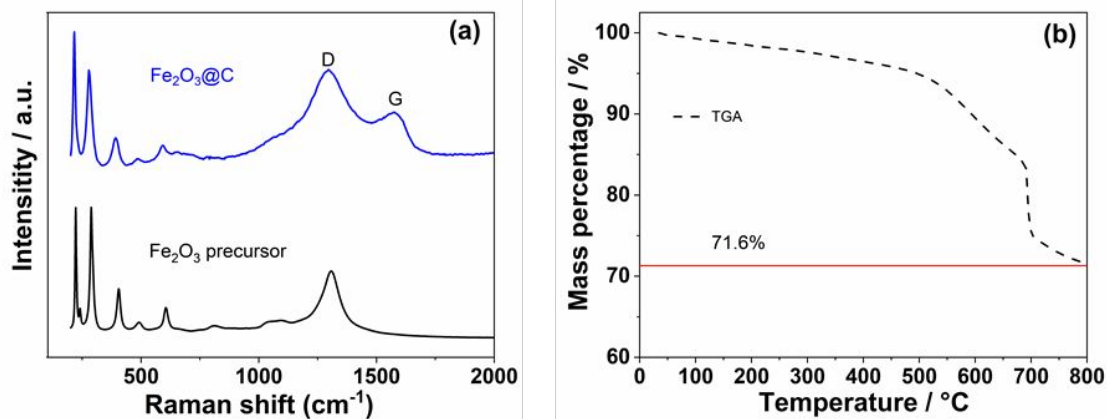

**Figure S1.** (a) The Raman spectra of the Fe<sub>2</sub>O<sub>3</sub> precursor and Fe<sub>2</sub>O<sub>3</sub>@C and (b) TGA curve of the Fe<sub>2</sub>O<sub>3</sub>@C composite material.

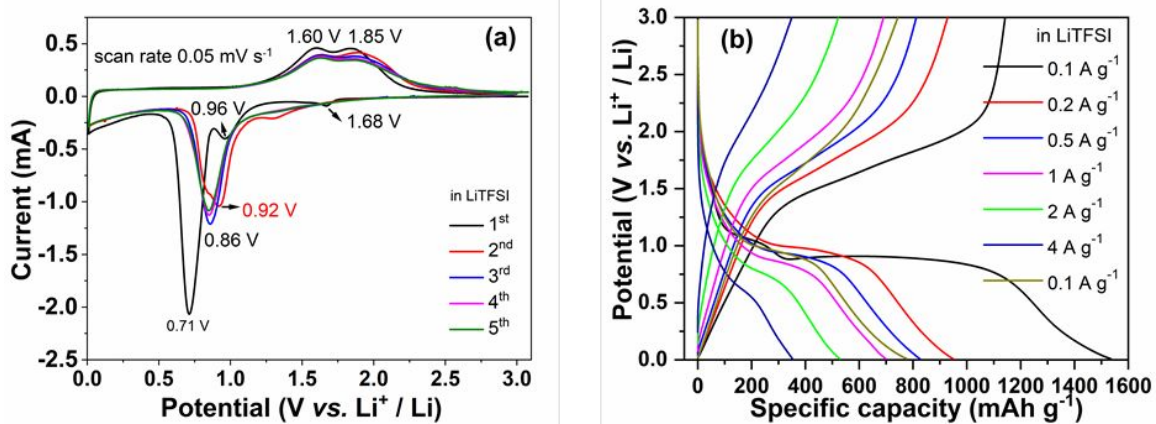

**Figure S2.** (a) CV profiles of the 1<sup>st</sup> to 5<sup>th</sup> for the Fe<sub>2</sub>O<sub>3</sub>@C at a sweep rate of 0.05 mV s<sup>-1</sup> in LiTFSI. (b) The galvanostatic profiles at various current densities in LiTFSI.

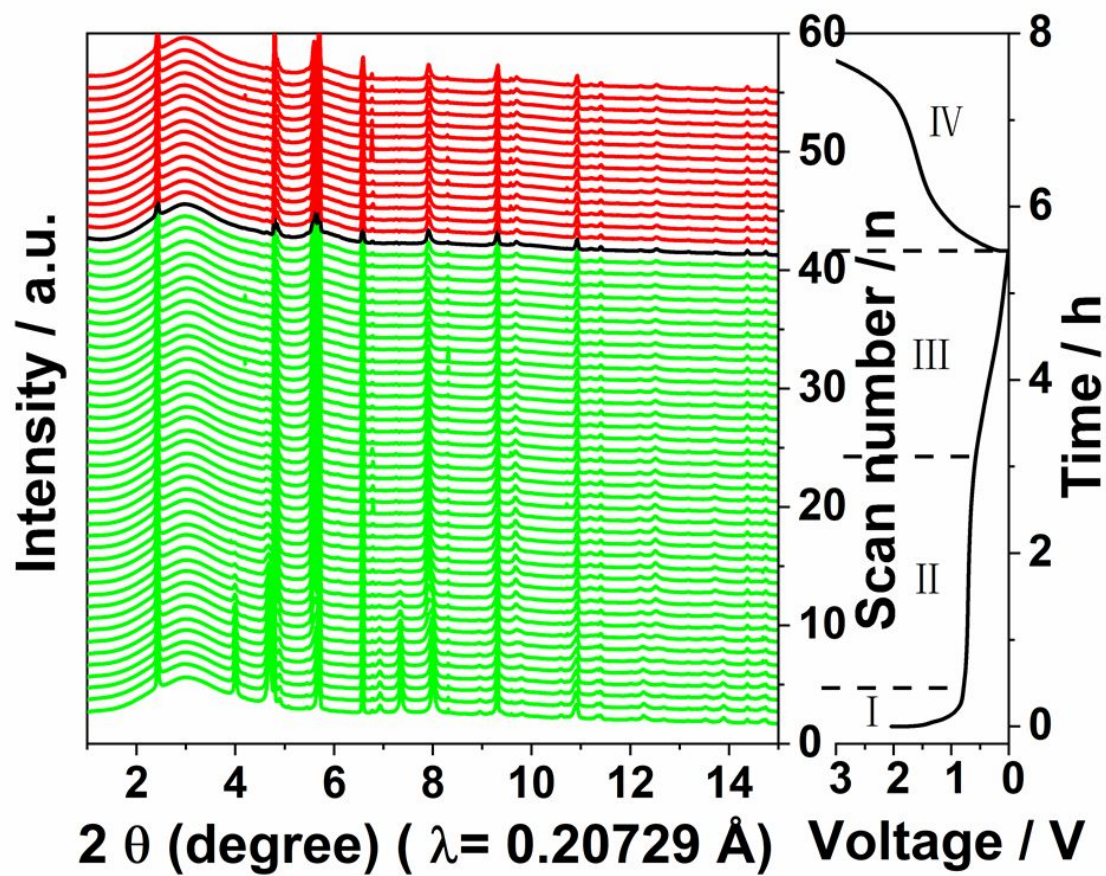

**Figure S3.** *In operando* XRD investigate of the lithium storage mechanism of the  $\text{Fe}_2\text{O}_3@\text{C}$  electrode: The structural evolution during the first lithiation /de-lithiation processes in LiTFSI.

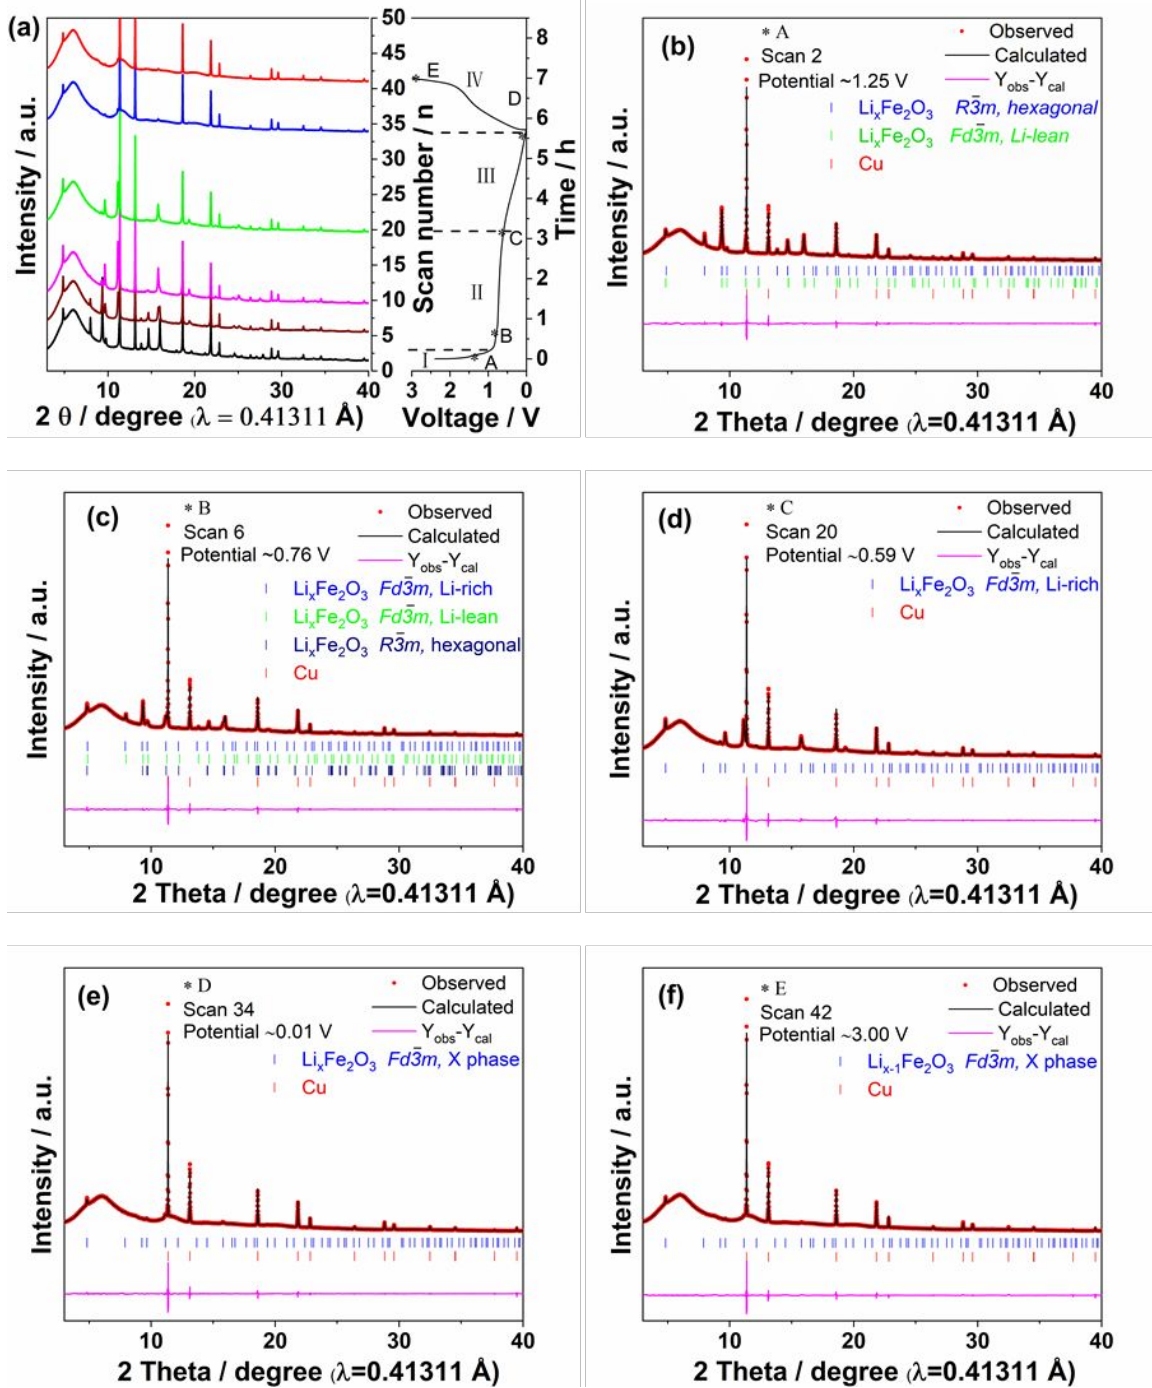

**Figure S4.** (a) *In operando* SRD patterns of the Fe<sub>2</sub>O<sub>3</sub>@C electrode was collected at various potential states. The Rietveld refinement results of the electrode at some selected potentials (A-E): the 1<sup>st</sup> lithiation to 1.25 V (b), 0.76 V (c), 0.59 V (d), 0.01 V (e), and the 1<sup>st</sup> de-lithiation to 3.00 V (f).

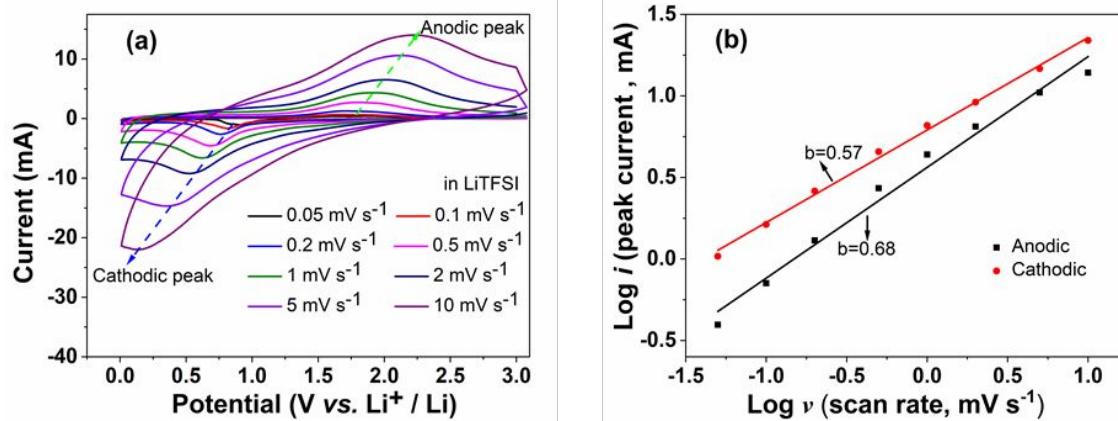

**Figure S5.** Kinetics characterization of the  $\text{Fe}_2\text{O}_3@\text{C}$  electrode in LiTFSI: (a) CV profiles with scan rates between  $0.05$  to  $10 \text{ mV s}^{-1}$ . (b) The linear relationship of  $\text{log } i$  (peak current) vs.  $\text{log } \nu$  (scan rate) for anodic and cathodic peaks.

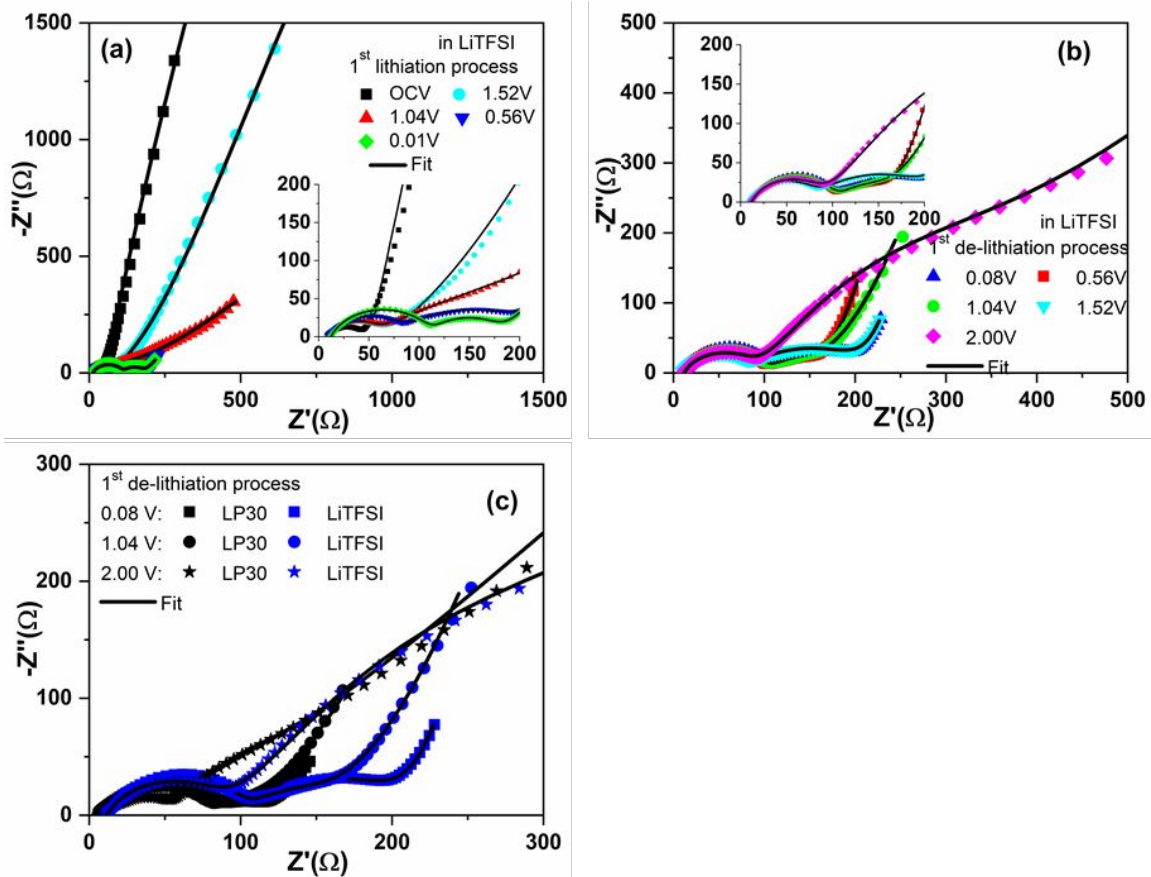

**Figure S6.** Nyquist plots of the  $\text{Fe}_2\text{O}_3@\text{C}$  electrode measured on the freshly assembled cell (OCV) and at selected potentials during the first lithiation (a) and de-lithiation (b) processes in LiTFSI. Comparison of the Nyquist plots of  $\text{Fe}_2\text{O}_3@\text{C}$  electrode was evaluated at 2.0, 1.04, and 0.01 V vs.  $\text{Li}^+/\text{Li}$  during the de-lithiation process in LP30 and LiTFSI (c).
